# Supplementary material for: Genomic organization and expression profiles of nitrogen assimilation genes in Glycine max
Source: PeerJ. 2024 Jun 24;12:e17590. doi: 10.7717/peerj.17590 (PMC11210457; doi:10.7717/peerj.17590)
Supplement: Supplemental Information 2 [file peerj-12-17590-s002.xlsx]

## Sheet: Table S1
Table S1. List of GmGS,GmGOGAT, and GmNR gene primers used for the qRT-PCR analysis.
Gene name	Gene ID	Primers sequence
		Forward	Reversed
GmGS4	Glyma.09G173200.1	ACATCAACACCTTCTCTTGGG	GCCTTCTGTCCTCAAAGTAACC
GmGS6	Glyma.11G215500.1	GAAACCGCTGACATCAACAC	TGTCCTCAAAATATCCCTTCCC
GmGS10	Glyma.18G041100.1	TTCCCCTTCAACACTCCAAC	AGCATCCCACTCAACAGC
GmFd-GOGAT1	Glyma.03G128300.4	AATCCAACGGGTGTCAGC	GAACCAGCTGCCAAAATAGTG
GmNADH-GOGAT1	Glyma.04G236900.2	GAGAAGGATGAAACTGGGAGG	GTCTCGCTCTATACCCAACTTC
GmNADH-GOGAT3	Glyma.14G162300.1	GGAAATTGAGGGATCGGAGG	GCCTTGAAGTTTGACCTGTTG
GmNIA2	Glyma.13G084000.1	GTGGTACTGACAGCATCCTC	GTTGGGCGATGAGTCTGAG
GmActin11	Glyma.18G290800.1	ATCTTGACTGAGCGTGGTTATTCC	GCTGGTCCTGGCTGTCTCC
