# Supplementary material for: Genomic organization and expression profiles of nitrogen assimilation genes in Glycine max
Source: PeerJ. 2024 Jun 24;12:e17590. doi: 10.7717/peerj.17590 (PMC11210457; doi:10.7717/peerj.17590)
Supplement: Supplemental Information 3 [file peerj-12-17590-s003.xlsx]

## Sheet: DN-CK
Table S2. qPCR raw data.
Well	Fluor	Target	Content	Sample	Cq
A01	SYBR	GmFd-GOGAT1	Unkn	DN-CK-1	17.7498
A02	SYBR	GmFd-GOGAT1	Unkn	DN-CK-1	17.9087
A03	SYBR	GmFd-GOGAT1	Unkn	DN-CK-1	17.769
A04	SYBR	GmFd-GOGAT1	Unkn	DN-CK-2	18.8042
A05	SYBR	GmFd-GOGAT1	Unkn	DN-CK-2	18.8894
A06	SYBR	GmFd-GOGAT1	Unkn	DN-CK-2	18.981
A07	SYBR	GmFd-GOGAT1	Unkn	DN-CK-3	19.6979
A08	SYBR	GmFd-GOGAT1	Unkn	DN-CK-3	19.7726
A09	SYBR	GmFd-GOGAT1	Unkn	DN-CK-3	19.6226
A10	SYBR	GmNADH-GOGAT1	Unkn	DN-CK-1	18.1675
A11	SYBR	GmNADH-GOGAT1	Unkn	DN-CK-1	18.1152
A12	SYBR	GmNADH-GOGAT1	Unkn	DN-CK-1	18.0729
B01	SYBR	GmNADH-GOGAT1	Unkn	DN-CK-2	19.1898
B02	SYBR	GmNADH-GOGAT1	Unkn	DN-CK-2	19.2775
B03	SYBR	GmNADH-GOGAT1	Unkn	DN-CK-2	19.4525
B04	SYBR	GmNADH-GOGAT1	Unkn	DN-CK-3	20.5771
B05	SYBR	GmNADH-GOGAT1	Unkn	DN-CK-3	20.4031
B06	SYBR	GmNADH-GOGAT1	Unkn	DN-CK-3	20.155
B07	SYBR	GmNADH-GOGAT3	Unkn	DN-CK-1	24.6847
B08	SYBR	GmNADH-GOGAT3	Unkn	DN-CK-1	24.9692
B09	SYBR	GmNADH-GOGAT3	Unkn	DN-CK-1	24.887
B10	SYBR	GmNADH-GOGAT3	Unkn	DN-CK-2	24.8707
B11	SYBR	GmNADH-GOGAT3	Unkn	DN-CK-2	24.7497
B12	SYBR	GmNADH-GOGAT3	Unkn	DN-CK-2	25.1023
C01	SYBR	GmNADH-GOGAT3	Unkn	DN-CK-3	27.6072
C02	SYBR	GmNADH-GOGAT3	Unkn	DN-CK-3	27.4545
C03	SYBR	GmNADH-GOGAT3	Unkn	DN-CK-3	27.3212
C04	SYBR	GmGS4	Unkn	DN-CK-1	21.3089
C05	SYBR	GmGS4	Unkn	DN-CK-1	21.4975
C06	SYBR	GmGS4	Unkn	DN-CK-1	21.2879
C07	SYBR	GmGS4	Unkn	DN-CK-2	22.7857
C08	SYBR	GmGS4	Unkn	DN-CK-2	22.7752
C09	SYBR	GmGS4	Unkn	DN-CK-2	22.7916
C10	SYBR	GmGS4	Unkn	DN-CK-3	23.2872
C11	SYBR	GmGS4	Unkn	DN-CK-3	23.3412
C12	SYBR	GmGS4	Unkn	DN-CK-3	23.367
D01	SYBR	GmGS6	Unkn	DN-CK-1	17.647
D02	SYBR	GmGS6	Unkn	DN-CK-1	17.6063
D03	SYBR	GmGS6	Unkn	DN-CK-1	17.5873
D04	SYBR	GmGS6	Unkn	DN-CK-2	18.8128
D05	SYBR	GmGS6	Unkn	DN-CK-2	18.796
D06	SYBR	GmGS6	Unkn	DN-CK-2	19.0321
D07	SYBR	GmGS6	Unkn	DN-CK-3	19.3901
D08	SYBR	GmGS6	Unkn	DN-CK-3	19.388
D09	SYBR	GmGS6	Unkn	DN-CK-3	19.1874
D10	SYBR	GmGS10	Unkn	DN-CK-1	35.4156
D11	SYBR	GmGS10	Unkn	DN-CK-1	36.6463
D12	SYBR	GmGS10	Unkn	DN-CK-1	31.2655
E01	SYBR	GmGS10	Unkn	DN-CK-2	36.0703
E02	SYBR	GmGS10	Unkn	DN-CK-2	36.0703
E03	SYBR	GmGS10	Unkn	DN-CK-2	37.1136
E04	SYBR	GmGS10	Unkn	DN-CK-3	36.1222
E05	SYBR	GmGS10	Unkn	DN-CK-3	35.9786
E06	SYBR	GmGS10	Unkn	DN-CK-3	37.333
E07	SYBR	GmNIA2	Unkn	DN-CK-1	19.099
E08	SYBR	GmNIA2	Unkn	DN-CK-1	19.0016
E09	SYBR	GmNIA2	Unkn	DN-CK-1	18.7469
E10	SYBR	GmNIA2	Unkn	DN-CK-2	19.3237
E11	SYBR	GmNIA2	Unkn	DN-CK-2	19.0067
E12	SYBR	GmNIA2	Unkn	DN-CK-2	18.9103
F01	SYBR	GmNIA2	Unkn	DN-CK-3	19.3648
F02	SYBR	GmNIA2	Unkn	DN-CK-3	19.8346
F03	SYBR	GmNIA2	Unkn	DN-CK-3	19.4975
F04	SYBR	Actin	Unkn	DN-CK-1	18.5686
F05	SYBR	Actin	Unkn	DN-CK-1	18.6053
F06	SYBR	Actin	Unkn	DN-CK-1	18.3735
F07	SYBR	Actin	Unkn	DN-CK-2	19.5616
F08	SYBR	Actin	Unkn	DN-CK-2	19.8122
F09	SYBR	Actin	Unkn	DN-CK-2	19.8584
F10	SYBR	Actin	Unkn	DN-CK-3	20.0272
F11	SYBR	Actin	Unkn	DN-CK-3	19.9064
F12	SYBR	Actin	Unkn	DN-CK-3	19.9714

## Sheet: D-HN treatment
Well	Fluor	Target	Content	Sample	Cq
A01	SYBR	GmFd-GOGAT1	Unkn	D-HN.1	19.1628
A02	SYBR	GmFd-GOGAT1	Unkn	D-HN.1	19.2003
A03	SYBR	GmFd-GOGAT1	Unkn	D-HN.1	19.0811
A04	SYBR	GmFd-GOGAT1	Unkn	D-HN.2	19.6286
A05	SYBR	GmFd-GOGAT1	Unkn	D-HN.2	19.1846
A06	SYBR	GmFd-GOGAT1	Unkn	D-HN.2	19.2438
A07	SYBR	GmFd-GOGAT1	Unkn	D-HN.3	18.7609
A08	SYBR	GmFd-GOGAT1	Unkn	D-HN.3	18.5473
A09	SYBR	GmFd-GOGAT1	Unkn	D-HN.3	18.6237
A10	SYBR	GmNADH-GOGAT1	Unkn	D-HN.1	23.1633
A11	SYBR	GmNADH-GOGAT1	Unkn	D-HN.1	23.3117
A12	SYBR	GmNADH-GOGAT1	Unkn	D-HN.1	23.0628
B01	SYBR	GmNADH-GOGAT1	Unkn	D-HN.2	23.0788
B02	SYBR	GmNADH-GOGAT1	Unkn	D-HN.2	22.9573
B03	SYBR	GmNADH-GOGAT1	Unkn	D-HN.2	23.0429
B04	SYBR	GmNADH-GOGAT1	Unkn	D-HN.3	22.9703
B05	SYBR	GmNADH-GOGAT1	Unkn	D-HN.3	22.5696
B06	SYBR	GmNADH-GOGAT1	Unkn	D-HN.3	22.6442
B07	SYBR	GmNADH-GOGAT3	Unkn	D-HN.1	28.1654
B08	SYBR	GmNADH-GOGAT3	Unkn	D-HN.1	28.1325
B09	SYBR	GmNADH-GOGAT3	Unkn	D-HN.1	28.4205
B10	SYBR	GmNADH-GOGAT3	Unkn	D-HN.2	27.3842
B11	SYBR	GmNADH-GOGAT3	Unkn	D-HN.2	27.1196
B12	SYBR	GmNADH-GOGAT3	Unkn	D-HN.2	27.2723
C01	SYBR	GmNADH-GOGAT3	Unkn	D-HN.3	26.871
C02	SYBR	GmNADH-GOGAT3	Unkn	D-HN.3	26.7307
C03	SYBR	GmNADH-GOGAT3	Unkn	D-HN.3	26.8261
C04	SYBR	GmGS4	Unkn	D-HN.1	25.1212
C05	SYBR	GmGS4	Unkn	D-HN.1	25.0447
C06	SYBR	GmGS4	Unkn	D-HN.1	24.7592
C07	SYBR	GmGS4	Unkn	D-HN.2	24.7401
C08	SYBR	GmGS4	Unkn	D-HN.2	24.8182
C09	SYBR	GmGS4	Unkn	D-HN.2	24.8498
C10	SYBR	GmGS4	Unkn	D-HN.3	23.5176
C11	SYBR	GmGS4	Unkn	D-HN.3	24.2838
C12	SYBR	GmGS4	Unkn	D-HN.3	24.2795
D01	SYBR	GmGS6	Unkn	D-HN.1	21.3322
D02	SYBR	GmGS6	Unkn	D-HN.1	21.3641
D03	SYBR	GmGS6	Unkn	D-HN.1	21.2014
D04	SYBR	GmGS6	Unkn	D-HN.2	21.4744
D05	SYBR	GmGS6	Unkn	D-HN.2	21.2485
D06	SYBR	GmGS6	Unkn	D-HN.2	21.3103
D07	SYBR	GmGS6	Unkn	D-HN.3	20.6204
D08	SYBR	GmGS6	Unkn	D-HN.3	20.6635
D09	SYBR	GmGS6	Unkn	D-HN.3	20.7577
D10	SYBR	GmGS10	Unkn	D-HN.1	33.5696
D11	SYBR	GmGS10	Unkn	D-HN.1	34.8601
D12	SYBR	GmGS10	Unkn	D-HN.1	33.4277
E01	SYBR	GmGS10	Unkn	D-HN.2	35.7162
E02	SYBR	GmGS10	Unkn	D-HN.2	34.487
E03	SYBR	GmGS10	Unkn	D-HN.2	35.1835
E04	SYBR	GmGS10	Unkn	D-HN.3	40.0918
E05	SYBR	GmGS10	Unkn	D-HN.3	36.1433
E06	SYBR	GmGS10	Unkn	D-HN.3	35.0525
E07	SYBR	GmNIA2	Unkn	D-HN.1	23.3077
E08	SYBR	GmNIA2	Unkn	D-HN.1	23.4535
E09	SYBR	GmNIA2	Unkn	D-HN.1	23.217
E10	SYBR	GmNIA2	Unkn	D-HN.2	22.5153
E11	SYBR	GmNIA2	Unkn	D-HN.2	22.2791
E12	SYBR	GmNIA2	Unkn	D-HN.2	22.4768
F01	SYBR	GmNIA2	Unkn	D-HN.3	22.0025
F02	SYBR	GmNIA2	Unkn	D-HN.3	22.019
F03	SYBR	GmNIA2	Unkn	D-HN.3	22.0025
F04	SYBR	Actin	Unkn	D-HN.1	20.9237
F05	SYBR	Actin	Unkn	D-HN.1	20.6887
F06	SYBR	Actin	Unkn	D-HN.1	20.3626
F07	SYBR	Actin	Unkn	D-HN.2	20.5113
F08	SYBR	Actin	Unkn	D-HN.2	20.4875
F09	SYBR	Actin	Unkn	D-HN.2	21.7863
F10	SYBR	Actin	Unkn	D-HN.3	19.9852
F11	SYBR	Actin	Unkn	D-HN.3	20.0421
F12	SYBR	Actin	Unkn	D-HN.3	20.18

## Sheet: D-NN treatment
Well	Fluor	Target	Content	Sample	Cq
A01	SYBR	GmFd-GOGAT1	Unkn	D-NN.1	18.6875
A02	SYBR	GmFd-GOGAT1	Unkn	D-NN.1	18.6884
A03	SYBR	GmFd-GOGAT1	Unkn	D-NN.1	18.3883
A04	SYBR	GmFd-GOGAT1	Unkn	D-NN.2	18.9244
A05	SYBR	GmFd-GOGAT1	Unkn	D-NN.2	18.573
A06	SYBR	GmFd-GOGAT1	Unkn	D-NN.2	18.789
A07	SYBR	GmFd-GOGAT1	Unkn	D-NN.3	17.2113
A08	SYBR	GmFd-GOGAT1	Unkn	D-NN.3	17.7957
A09	SYBR	GmFd-GOGAT1	Unkn	D-NN.3	17.6412
A10	SYBR	GmNADH-GOGAT1	Unkn	D-NN.1	22.3581
A11	SYBR	GmNADH-GOGAT1	Unkn	D-NN.1	22.5333
A12	SYBR	GmNADH-GOGAT1	Unkn	D-NN.1	22.255
B01	SYBR	GmNADH-GOGAT1	Unkn	D-NN.2	22.6366
B02	SYBR	GmNADH-GOGAT1	Unkn	D-NN.2	22.4319
B03	SYBR	GmNADH-GOGAT1	Unkn	D-NN.2	22.5614
B04	SYBR	GmNADH-GOGAT1	Unkn	D-NN.3	21.9588
B05	SYBR	GmNADH-GOGAT1	Unkn	D-NN.3	21.6237
B06	SYBR	GmNADH-GOGAT1	Unkn	D-NN.3	21.5449
B07	SYBR	GmNADH-GOGAT3	Unkn	D-NN.1	25.0804
B08	SYBR	GmNADH-GOGAT3	Unkn	D-NN.1	25.1068
B09	SYBR	GmNADH-GOGAT3	Unkn	D-NN.1	25.112
B10	SYBR	GmNADH-GOGAT3	Unkn	D-NN.2	25.1423
B11	SYBR	GmNADH-GOGAT3	Unkn	D-NN.2	24.9484
B12	SYBR	GmNADH-GOGAT3	Unkn	D-NN.2	25.147
C01	SYBR	GmNADH-GOGAT3	Unkn	D-NN.3	25.5652
C02	SYBR	GmNADH-GOGAT3	Unkn	D-NN.3	25.6217
C03	SYBR	GmNADH-GOGAT3	Unkn	D-NN.3	25.5206
C04	SYBR	GmGS4	Unkn	D-NN.1	24.6827
C05	SYBR	GmGS4	Unkn	D-NN.1	24.7834
C06	SYBR	GmGS4	Unkn	D-NN.1	24.6493
C07	SYBR	GmGS4	Unkn	D-NN.2	24.8457
C08	SYBR	GmGS4	Unkn	D-NN.2	24.5947
C09	SYBR	GmGS4	Unkn	D-NN.2	24.9624
C10	SYBR	GmGS4	Unkn	D-NN.3	24.1914
C11	SYBR	GmGS4	Unkn	D-NN.3	23.8399
C12	SYBR	GmGS4	Unkn	D-NN.3	23.805
D01	SYBR	GmGS6	Unkn	D-NN.1	21.0068
D02	SYBR	GmGS6	Unkn	D-NN.1	21.1112
D03	SYBR	GmGS6	Unkn	D-NN.1	20.9741
D04	SYBR	GmGS6	Unkn	D-NN.2	21.299
D05	SYBR	GmGS6	Unkn	D-NN.2	20.9603
D06	SYBR	GmGS6	Unkn	D-NN.2	21.038
D07	SYBR	GmGS6	Unkn	D-NN.3	20.1656
D08	SYBR	GmGS6	Unkn	D-NN.3	20.5208
D09	SYBR	GmGS6	Unkn	D-NN.3	20.1962
D10	SYBR	GmGS10	Unkn	D-NN.1	33.0147
D11	SYBR	GmGS10	Unkn	D-NN.1	33.847
D12	SYBR	GmGS10	Unkn	D-NN.1	32.0193
E01	SYBR	GmGS10	Unkn	D-NN.2	34.477
E02	SYBR	GmGS10	Unkn	D-NN.2	34.5243
E03	SYBR	GmGS10	Unkn	D-NN.2	34.5751
E04	SYBR	GmGS10	Unkn	D-NN.3	33.9385
E05	SYBR	GmGS10	Unkn	D-NN.3	33.8283
E06	SYBR	GmGS10	Unkn	D-NN.3	33.1215
E07	SYBR	GmNIA2	Unkn	D-NN.1	22.1689
E08	SYBR	GmNIA2	Unkn	D-NN.1	22.3457
E09	SYBR	GmNIA2	Unkn	D-NN.1	22.1657
E10	SYBR	GmNIA2	Unkn	D-NN.2	22.2031
E11	SYBR	GmNIA2	Unkn	D-NN.2	22.236
E12	SYBR	GmNIA2	Unkn	D-NN.2	22.2979
F01	SYBR	GmNIA2	Unkn	D-NN.3	21.8354
F02	SYBR	GmNIA2	Unkn	D-NN.3	21.23
F03	SYBR	GmNIA2	Unkn	D-NN.3	21.5484
F04	SYBR	Actin	Unkn	D-NN.1	20.2569
F05	SYBR	Actin	Unkn	D-NN.1	20.2167
F06	SYBR	Actin	Unkn	D-NN.1	19.324
F07	SYBR	Actin	Unkn	D-NN.2	20.3564
F08	SYBR	Actin	Unkn	D-NN.2	20.3181
F09	SYBR	Actin	Unkn	D-NN.2	21.3238
F10	SYBR	Actin	Unkn	D-NN.3	19.1979
F11	SYBR	Actin	Unkn	D-NN.3	19.3079
F12	SYBR	Actin	Unkn	D-NN.3	19.2345

## Sheet: D-LN treatment
	Well	Fluor	Target	Content	Sample	Cq
	A01	SYBR	GmFd-GOGAT1	Unkn	D-LN.1	18.8189
	A02	SYBR	GmFd-GOGAT1	Unkn	D-LN.1	18.9126
	A03	SYBR	GmFd-GOGAT1	Unkn	D-LN.1	18.7962
	A04	SYBR	GmFd-GOGAT1	Unkn	D-LN.2	18.6525
	A05	SYBR	GmFd-GOGAT1	Unkn	D-LN.2	18.4931
	A06	SYBR	GmFd-GOGAT1	Unkn	D-LN.2	18.6277
	A07	SYBR	GmFd-GOGAT1	Unkn	D-LN.3	19.0014
	A08	SYBR	GmFd-GOGAT1	Unkn	D-LN.3	18.8015
	A09	SYBR	GmFd-GOGAT1	Unkn	D-LN.3	18.7585
	A10	SYBR	GmNADH-GOGAT1	Unkn	D-LN.1	22.1842
	A11	SYBR	GmNADH-GOGAT1	Unkn	D-LN.1	22.2859
	A12	SYBR	GmNADH-GOGAT1	Unkn	D-LN.1	22.3449
	B01	SYBR	GmNADH-GOGAT1	Unkn	D-LN.2	22.1679
	B02	SYBR	GmNADH-GOGAT1	Unkn	D-LN.2	22.0913
	B03	SYBR	GmNADH-GOGAT1	Unkn	D-LN.2	22.2898
	B04	SYBR	GmNADH-GOGAT1	Unkn	D-LN.3	23.4034
	B05	SYBR	GmNADH-GOGAT1	Unkn	D-LN.3	23.1231
	B06	SYBR	GmNADH-GOGAT1	Unkn	D-LN.3	22.9528
	B07	SYBR	GmNADH-GOGAT3	Unkn	D-LN.1	24.8111
	B08	SYBR	GmNADH-GOGAT3	Unkn	D-LN.1	27.9991
	B09	SYBR	GmNADH-GOGAT3	Unkn	D-LN.1	27.8905
	B10	SYBR	GmNADH-GOGAT3	Unkn	D-LN.2	27.9617
	B11	SYBR	GmNADH-GOGAT3	Unkn	D-LN.2	27.166
	B12	SYBR	GmNADH-GOGAT3	Unkn	D-LN.2	27.0306
	C01	SYBR	GmNADH-GOGAT3	Unkn	D-LN.3	27.7391
	C02	SYBR	GmNADH-GOGAT3	Unkn	D-LN.3	27.8623
	C03	SYBR	GmNADH-GOGAT3	Unkn	D-LN.3	28.1735
	C04	SYBR	GmGS4	Unkn	D-LN.1	24.8893
	C05	SYBR	GmGS4	Unkn	D-LN.1	24.9527
	C06	SYBR	GmGS4	Unkn	D-LN.1	24.6401
	C07	SYBR	GmGS4	Unkn	D-LN.2	24.8188
	C08	SYBR	GmGS4	Unkn	D-LN.2	24.808
	C09	SYBR	GmGS4	Unkn	D-LN.2	25.0148
	C10	SYBR	GmGS4	Unkn	D-LN.3	25.0073
	C11	SYBR	GmGS4	Unkn	D-LN.3	25.025
	C12	SYBR	GmGS4	Unkn	D-LN.3	24.8284
	D01	SYBR	GmGS6	Unkn	D-LN.1	21.0517
	D02	SYBR	GmGS6	Unkn	D-LN.1	21.1638
	D03	SYBR	GmGS6	Unkn	D-LN.1	21.0227
	D04	SYBR	GmGS6	Unkn	D-LN.2	21.6614
	D05	SYBR	GmGS6	Unkn	D-LN.2	21.427
	D06	SYBR	GmGS6	Unkn	D-LN.2	21.4849
	D07	SYBR	GmGS6	Unkn	D-LN.3	21.7317
	D08	SYBR	GmGS6	Unkn	D-LN.3	21.5647
	D09	SYBR	GmGS6	Unkn	D-LN.3	21.3396
	D10	SYBR	GmGS10	Unkn	D-LN.1	33.7291
	D11	SYBR	GmGS10	Unkn	D-LN.1	33.0165
	D12	SYBR	GmGS10	Unkn	D-LN.1	33.9693
	E01	SYBR	GmGS10	Unkn	D-LN.2	36.2513
	E02	SYBR	GmGS10	Unkn	D-LN.2	33.3467
	E03	SYBR	GmGS10	Unkn	D-LN.2	33.171
	E04	SYBR	GmGS10	Unkn	D-LN.3	35.1175
	E05	SYBR	GmGS10	Unkn	D-LN.3	33.0966
	E06	SYBR	GmGS10	Unkn	D-LN.3	33.1234
	E07	SYBR	GmNIA2	Unkn	D-LN.1	21.5924
	E08	SYBR	GmNIA2	Unkn	D-LN.1	21.9497
	E09	SYBR	GmNIA2	Unkn	D-LN.1	21.6678
	E10	SYBR	GmNIA2	Unkn	D-LN.2	21.1144
	E11	SYBR	GmNIA2	Unkn	D-LN.2	20.9338
	E12	SYBR	GmNIA2	Unkn	D-LN.2	21.2109
	F01	SYBR	GmNIA2	Unkn	D-LN.3	20.7883
	F02	SYBR	GmNIA2	Unkn	D-LN.3	21.3318
	F03	SYBR	GmNIA2	Unkn	D-LN.3	21.6175
	F04	SYBR	Actin	Unkn	D-LN.1	20.5326
	F05	SYBR	Actin	Unkn	D-LN.1	20.4539
	F06	SYBR	Actin	Unkn	D-LN.1	20.7172
	F07	SYBR	Actin	Unkn	D-LN.2	19.9802
	F08	SYBR	Actin	Unkn	D-LN.2	20.2387
	F09	SYBR	Actin	Unkn	D-LN.2	20.4806
	F10	SYBR	Actin	Unkn	D-LN.3	20.4946
	F11	SYBR	Actin	Unkn	D-LN.3	20.4336
	F12	SYBR	Actin	Unkn	D-LN.3	20.3727

## Sheet: N-CK
Well	Fluor	Target	Content	Sample	Cq
A01	SYBR	GmFd-GOGAT1	Unkn	N-CK1	17.5706
A02	SYBR	GmFd-GOGAT1	Unkn	N-CK1	17.5889
A03	SYBR	GmFd-GOGAT1	Unkn	N-CK1	17.5356
A04	SYBR	GmFd-GOGAT1	Unkn	N-CK2	18.0728
A05	SYBR	GmFd-GOGAT1	Unkn	N-CK2	18.078
A06	SYBR	GmFd-GOGAT1	Unkn	N-CK2	18.084
A07	SYBR	GmFd-GOGAT1	Unkn	N-CK3	19.0748
A08	SYBR	GmFd-GOGAT1	Unkn	N-CK3	19.0539
A09	SYBR	GmFd-GOGAT1	Unkn	N-CK3	19.1041
A10	SYBR	GmNADH-GOGAT1	Unkn	N-CK1	21.6194
A11	SYBR	GmNADH-GOGAT1	Unkn	N-CK1	21.5719
A12	SYBR	GmNADH-GOGAT1	Unkn	N-CK1	21.7497
B01	SYBR	GmNADH-GOGAT1	Unkn	N-CK2	22.5701
B02	SYBR	GmNADH-GOGAT1	Unkn	N-CK2	22.0132
B03	SYBR	GmNADH-GOGAT1	Unkn	N-CK2	22.1465
B04	SYBR	GmNADH-GOGAT1	Unkn	N-CK3	23.2887
B05	SYBR	GmNADH-GOGAT1	Unkn	N-CK3	22.863
B06	SYBR	GmNADH-GOGAT1	Unkn	N-CK3	23.0651
B07	SYBR	GmNADH-GOGAT3	Unkn	N-CK1	26.3029
B08	SYBR	GmNADH-GOGAT3	Unkn	N-CK1	25.9192
B09	SYBR	GmNADH-GOGAT3	Unkn	N-CK1	26.2314
B10	SYBR	GmNADH-GOGAT3	Unkn	N-CK2	26.5741
B11	SYBR	GmNADH-GOGAT3	Unkn	N-CK2	26.3816
B12	SYBR	GmNADH-GOGAT3	Unkn	N-CK2	26.7026
C01	SYBR	GmNADH-GOGAT3	Unkn	N-CK3	28.6299
C02	SYBR	GmNADH-GOGAT3	Unkn	N-CK3	27.5228
C03	SYBR	GmNADH-GOGAT3	Unkn	N-CK3	27.9478
C04	SYBR	GmGS4	Unkn	N-CK1	24.1223
C05	SYBR	GmGS4	Unkn	N-CK1	24.1827
C06	SYBR	GmGS4	Unkn	N-CK1	23.8604
C07	SYBR	GmGS4	Unkn	N-CK2	23.8246
C08	SYBR	GmGS4	Unkn	N-CK2	23.7699
C09	SYBR	GmGS4	Unkn	N-CK2	23.9346
C10	SYBR	GmGS4	Unkn	N-CK3	25.5994
C11	SYBR	GmGS4	Unkn	N-CK3	25.3504
C12	SYBR	GmGS4	Unkn	N-CK3	25.6135
D01	SYBR	GmGS6	Unkn	N-CK1	20.3683
D02	SYBR	GmGS6	Unkn	N-CK1	20.6335
D03	SYBR	GmGS6	Unkn	N-CK1	20.3913
D04	SYBR	GmGS6	Unkn	N-CK2	20.3452
D05	SYBR	GmGS6	Unkn	N-CK2	20.2151
D06	SYBR	GmGS6	Unkn	N-CK2	20.4445
D07	SYBR	GmGS6	Unkn	N-CK3	22.3856
D08	SYBR	GmGS6	Unkn	N-CK3	21.8559
D09	SYBR	GmGS6	Unkn	N-CK3	21.7342
D10	SYBR	GmGS10	Unkn	N-CK1	36.8864
D11	SYBR	GmGS10	Unkn	N-CK1	35.555
D12	SYBR	GmGS10	Unkn	N-CK1	33.8452
E01	SYBR	GmGS10	Unkn	N-CK2	35.2186
E02	SYBR	GmGS10	Unkn	N-CK2	35.5377
E03	SYBR	GmGS10	Unkn	N-CK2	37.0084
E04	SYBR	GmGS10	Unkn	N-CK3	36.2359
E05	SYBR	GmGS10	Unkn	N-CK3	35.4755
E06	SYBR	GmGS10	Unkn	N-CK3	36.0001
E07	SYBR	GmNIA2	Unkn	N-CK1	20.6598
E08	SYBR	GmNIA2	Unkn	N-CK1	20.8902
E09	SYBR	GmNIA2	Unkn	N-CK1	20.4996
E10	SYBR	GmNIA2	Unkn	N-CK2	21.1302
E11	SYBR	GmNIA2	Unkn	N-CK2	21.1126
E12	SYBR	GmNIA2	Unkn	N-CK2	21.1822
F01	SYBR	GmNIA2	Unkn	N-CK3	21.1505
F02	SYBR	GmNIA2	Unkn	N-CK3	21.8172
F03	SYBR	GmNIA2	Unkn	N-CK3	21.0289
F04	SYBR	Actin	Unkn	N-CK1	19.2162
F05	SYBR	Actin	Unkn	N-CK1	19.1842
F06	SYBR	Actin	Unkn	N-CK1	19.2398
F07	SYBR	Actin	Unkn	N-CK2	19.4035
F08	SYBR	Actin	Unkn	N-CK2	19.2858
F09	SYBR	Actin	Unkn	N-CK2	19.5323
F10	SYBR	Actin	Unkn	N-CK3	20.2343
F11	SYBR	Actin	Unkn	N-CK3	20.5622
F12	SYBR	Actin	Unkn	N-CK3	20.2534

## Sheet: HN
	Well	Fluor	Target	Content	Sample	Cq
	A01	SYBR	GmFd-GOGAT1	Unkn	HN-1	19.9608
	A02	SYBR	GmFd-GOGAT1	Unkn	HN-1	19.9608
	A03	SYBR	GmFd-GOGAT1	Unkn	HN-1	18.6778
	A04	SYBR	GmFd-GOGAT1	Unkn	HN-2	18.5678
	A05	SYBR	GmFd-GOGAT1	Unkn	HN-2	18.5678
	A06	SYBR	GmFd-GOGAT1	Unkn	HN-2	18.1203
	A07	SYBR	GmFd-GOGAT1	Unkn	HN-3	19.2639
	A08	SYBR	GmFd-GOGAT1	Unkn	HN-3	19.1074
	A09	SYBR	GmFd-GOGAT1	Unkn	HN-3	19.0764
	A10	SYBR	GmNADH-GOGAT1	Unkn	HN-1	24.7549
	A11	SYBR	GmNADH-GOGAT1	Unkn	HN-1	22.7762
	A12	SYBR	GmNADH-GOGAT1	Unkn	HN-1	22.6339
	B01	SYBR	GmNADH-GOGAT1	Unkn	HN-2	22.9809
	B02	SYBR	GmNADH-GOGAT1	Unkn	HN-2	22.4243
	B03	SYBR	GmNADH-GOGAT1	Unkn	HN-2	22.197
	B04	SYBR	GmNADH-GOGAT1	Unkn	HN-3	23.6651
	B05	SYBR	GmNADH-GOGAT1	Unkn	HN-3	23.3484
	B06	SYBR	GmNADH-GOGAT1	Unkn	HN-3	23.2999
	B07	SYBR	GmNADH-GOGAT3	Unkn	HN-1	29.6953
	B08	SYBR	GmNADH-GOGAT3	Unkn	HN-1	27.2506
	B09	SYBR	GmNADH-GOGAT3	Unkn	HN-1	28.4826
	B10	SYBR	GmNADH-GOGAT3	Unkn	HN-2	27.0662
	B11	SYBR	GmNADH-GOGAT3	Unkn	HN-2	26.588
	B12	SYBR	GmNADH-GOGAT3	Unkn	HN-2	26.4914
	C01	SYBR	GmNADH-GOGAT3	Unkn	HN-3	27.2679
	C02	SYBR	GmNADH-GOGAT3	Unkn	HN-3	27.0109
	C03	SYBR	GmNADH-GOGAT3	Unkn	HN-3	27.3648
	C04	SYBR	GmGS4	Unkn	HN-1	26.6969
	C05	SYBR	GmGS4	Unkn	HN-1	24.4713
	C06	SYBR	GmGS4	Unkn	HN-1	26.6969
	C07	SYBR	GmGS4	Unkn	HN-2	25.1578
	C08	SYBR	GmGS4	Unkn	HN-2	25.1264
	C09	SYBR	GmGS4	Unkn	HN-2	24.5543
	C10	SYBR	GmGS4	Unkn	HN-3	25.6363
	C11	SYBR	GmGS4	Unkn	HN-3	25.4544
	C12	SYBR	GmGS4	Unkn	HN-3	25.3258
	D01	SYBR	GmGS6	Unkn	HN-1	22.935
	D02	SYBR	GmGS6	Unkn	HN-1	21.1209
	D03	SYBR	GmGS6	Unkn	HN-1	21.6677
	D04	SYBR	GmGS6	Unkn	HN-2	21.6372
	D05	SYBR	GmGS6	Unkn	HN-2	21.1694
	D06	SYBR	GmGS6	Unkn	HN-2	21.0744
	D07	SYBR	GmGS6	Unkn	HN-3	21.6446
	D08	SYBR	GmGS6	Unkn	HN-3	21.5668
	D09	SYBR	GmGS6	Unkn	HN-3	21.4274
	D10	SYBR	GmGS10	Unkn	HN-1	34.0485
	D11	SYBR	GmGS10	Unkn	HN-1	34.1283
	D12	SYBR	GmGS10	Unkn	HN-1	34.1163
	E01	SYBR	GmGS10	Unkn	HN-2	34.0987
	E02	SYBR	GmGS10	Unkn	HN-2	34.0086
	E03	SYBR	GmGS10	Unkn	HN-2	33.9419
	E04	SYBR	GmGS10	Unkn	HN-3	34.0624
	E05	SYBR	GmGS10	Unkn	HN-3	35.0263
	E06	SYBR	GmGS10	Unkn	HN-3	34.1015
	E07	SYBR	GmNIA2	Unkn	HN-1	23.5842
	E08	SYBR	GmNIA2	Unkn	HN-1	21.7265
	E09	SYBR	GmNIA2	Unkn	HN-1	21.6856
	E10	SYBR	GmNIA2	Unkn	HN-2	21.7222
	E11	SYBR	GmNIA2	Unkn	HN-2	21.3588
	E12	SYBR	GmNIA2	Unkn	HN-2	21.1203
	F01	SYBR	GmNIA2	Unkn	HN-3	21.7986
	F02	SYBR	GmNIA2	Unkn	HN-3	21.72
	F03	SYBR	GmNIA2	Unkn	HN-3	21.9199
	F04	SYBR	Actin	Unkn	HN-1	21.7007
	F05	SYBR	Actin	Unkn	HN-1	20.4727
	F06	SYBR	Actin	Unkn	HN-1	21.187
	F07	SYBR	Actin	Unkn	HN-2	20.0864
	F08	SYBR	Actin	Unkn	HN-2	19.6414
	F09	SYBR	Actin	Unkn	HN-2	19.8711
	F10	SYBR	Actin	Unkn	HN-3	20.3859
	F11	SYBR	Actin	Unkn	HN-3	20.4279
	F12	SYBR	Actin	Unkn	HN-3	20.3261

## Sheet: LN
Well	Fluor	Target	Content	Sample	Cq
A01	SYBR	GmFd-GOGAT1	Unkn	LN1	18.1377
A02	SYBR	GmFd-GOGAT1	Unkn	LN1	18.2531
A03	SYBR	GmFd-GOGAT1	Unkn	LN1	18.2221
A04	SYBR	GmFd-GOGAT1	Unkn	LN2	19.0479
A05	SYBR	GmFd-GOGAT1	Unkn	LN2	19.1189
A06	SYBR	GmFd-GOGAT1	Unkn	LN2	19.1227
A07	SYBR	GmFd-GOGAT1	Unkn	LN3	18.6272
A08	SYBR	GmFd-GOGAT1	Unkn	LN3	18.8157
A09	SYBR	GmFd-GOGAT1	Unkn	LN3	18.7739
A10	SYBR	GmNADH-GOGAT1	Unkn	LN1	21.666
A11	SYBR	GmNADH-GOGAT1	Unkn	LN1	21.8893
A12	SYBR	GmNADH-GOGAT1	Unkn	LN1	21.9488
B01	SYBR	GmNADH-GOGAT1	Unkn	LN2	22.9043
B02	SYBR	GmNADH-GOGAT1	Unkn	LN2	22.6006
B03	SYBR	GmNADH-GOGAT1	Unkn	LN2	22.7502
B04	SYBR	GmNADH-GOGAT1	Unkn	LN3	23.3713
B05	SYBR	GmNADH-GOGAT1	Unkn	LN3	23.0236
B06	SYBR	GmNADH-GOGAT1	Unkn	LN3	23.0481
B07	SYBR	GmNADH-GOGAT3	Unkn	LN1	26.5181
B08	SYBR	GmNADH-GOGAT3	Unkn	LN1	26.5074
B09	SYBR	GmNADH-GOGAT3	Unkn	LN1	26.3714
B10	SYBR	GmNADH-GOGAT3	Unkn	LN2	28.0659
B11	SYBR	GmNADH-GOGAT3	Unkn	LN2	27.3
B12	SYBR	GmNADH-GOGAT3	Unkn	LN2	28.1086
C01	SYBR	GmNADH-GOGAT3	Unkn	LN3	26.2409
C02	SYBR	GmNADH-GOGAT3	Unkn	LN3	26.3919
C03	SYBR	GmNADH-GOGAT3	Unkn	LN3	26.1677
C04	SYBR	GmGS4	Unkn	LN1	23.878
C05	SYBR	GmGS4	Unkn	LN1	23.9787
C06	SYBR	GmGS4	Unkn	LN1	23.9187
C07	SYBR	GmGS4	Unkn	LN2	24.8777
C08	SYBR	GmGS4	Unkn	LN2	25.0052
C09	SYBR	GmGS4	Unkn	LN2	24.8639
C10	SYBR	GmGS4	Unkn	LN3	24.409
C11	SYBR	GmGS4	Unkn	LN3	24.4368
C12	SYBR	GmGS4	Unkn	LN3	24.4812
D01	SYBR	GmGS6	Unkn	LN1	20.2763
D02	SYBR	GmGS6	Unkn	LN1	20.8387
D03	SYBR	GmGS6	Unkn	LN1	20.3131
D04	SYBR	GmGS6	Unkn	LN2	21.3059
D05	SYBR	GmGS6	Unkn	LN2	21.1267
D06	SYBR	GmGS6	Unkn	LN2	20.4533
D07	SYBR	GmGS6	Unkn	LN3	20.7223
D08	SYBR	GmGS6	Unkn	LN3	20.4536
D09	SYBR	GmGS6	Unkn	LN3	21.2189
D10	SYBR	GmGS10	Unkn	LN1	33.2024
D11	SYBR	GmGS10	Unkn	LN1	32.4009
D12	SYBR	GmGS10	Unkn	LN1	32.6277
E01	SYBR	GmGS10	Unkn	LN2	38.8527
E02	SYBR	GmGS10	Unkn	LN2	32.0183
E03	SYBR	GmGS10	Unkn	LN2	32.9464
E04	SYBR	GmGS10	Unkn	LN3	32.3973
E05	SYBR	GmGS10	Unkn	LN3	32.191
E06	SYBR	GmGS10	Unkn	LN3	32.2837
E07	SYBR	GmNIA2	Unkn	LN1	20.4343
E08	SYBR	GmNIA2	Unkn	LN1	21.1595
E09	SYBR	GmNIA2	Unkn	LN1	20.5736
E10	SYBR	GmNIA2	Unkn	LN2	21.6359
E11	SYBR	GmNIA2	Unkn	LN2	21.931
E12	SYBR	GmNIA2	Unkn	LN2	22.3802
F01	SYBR	GmNIA2	Unkn	LN3	21.8621
F02	SYBR	GmNIA2	Unkn	LN3	21.7713
F03	SYBR	GmNIA2	Unkn	LN3	21.5007
F04	SYBR	Actin	Unkn	LN1	19.1071
F05	SYBR	Actin	Unkn	LN1	19.1698
F06	SYBR	Actin	Unkn	LN1	19.0565
F07	SYBR	Actin	Unkn	LN2	20.363
F08	SYBR	Actin	Unkn	LN2	20.4485
F09	SYBR	Actin	Unkn	LN2	20.4585
F10	SYBR	Actin	Unkn	LN3	19.6788
F11	SYBR	Actin	Unkn	LN3	19.5888
F12	SYBR	Actin	Unkn	LN3	19.5288

## Sheet: NaCl-CK
Well	Fluor	Target	Content	Sample	Cq
A01	SYBR	GmFd-GOGAT1	Unkn	NaCl-CK-1	20.2236
A02	SYBR	GmFd-GOGAT1	Unkn	NaCl-CK-1	20.0857
A03	SYBR	GmFd-GOGAT1	Unkn	NaCl-CK-1	19.9495
A04	SYBR	GmFd-GOGAT1	Unkn	NaCl-CK-2	21.8973
A05	SYBR	GmFd-GOGAT1	Unkn	NaCl-CK-2	21.6515
A06	SYBR	GmFd-GOGAT1	Unkn	NaCl-CK-2	21.7311
A07	SYBR	GmFd-GOGAT1	Unkn	NaCl-CK-3	21.0624
A08	SYBR	GmFd-GOGAT1	Unkn	NaCl-CK-3	21.0263
A09	SYBR	GmFd-GOGAT1	Unkn	NaCl-CK-3	21.1015
A10	SYBR	GmNADH-GOGAT1	Unkn	NaCl-CK-1	19.3581
A11	SYBR	GmNADH-GOGAT1	Unkn	NaCl-CK-1	19.8151
A12	SYBR	GmNADH-GOGAT1	Unkn	NaCl-CK-1	19.2332
B01	SYBR	GmNADH-GOGAT1	Unkn	NaCl-CK-2	19.4688
B02	SYBR	GmNADH-GOGAT1	Unkn	NaCl-CK-2	18.5924
B03	SYBR	GmNADH-GOGAT1	Unkn	NaCl-CK-2	19.4434
B04	SYBR	GmNADH-GOGAT1	Unkn	NaCl-CK-3	19.0179
B05	SYBR	GmNADH-GOGAT1	Unkn	NaCl-CK-3	18.932
B06	SYBR	GmNADH-GOGAT1	Unkn	NaCl-CK-3	18.8462
B07	SYBR	GmNADH-GOGAT3	Unkn	NaCl-CK-1	19.8096
B08	SYBR	GmNADH-GOGAT3	Unkn	NaCl-CK-1	19.5636
B09	SYBR	GmNADH-GOGAT3	Unkn	NaCl-CK-1	19.2065
B10	SYBR	GmNADH-GOGAT3	Unkn	NaCl-CK-2	19.7205
B11	SYBR	GmNADH-GOGAT3	Unkn	NaCl-CK-2	19.7586
B12	SYBR	GmNADH-GOGAT3	Unkn	NaCl-CK-2	19.8164
C01	SYBR	GmNADH-GOGAT3	Unkn	NaCl-CK-3	21.0742
C02	SYBR	GmNADH-GOGAT3	Unkn	NaCl-CK-3	20.9546
C03	SYBR	GmNADH-GOGAT3	Unkn	NaCl-CK-3	21.1355
C04	SYBR	GmGS4	Unkn	NaCl-CK-1	20.5026
C05	SYBR	GmGS4	Unkn	NaCl-CK-1	19.97
C06	SYBR	GmGS4	Unkn	NaCl-CK-1	19.2646
C07	SYBR	GmGS4	Unkn	NaCl-CK-2	21.1487
C08	SYBR	GmGS4	Unkn	NaCl-CK-2	21.0554
C09	SYBR	GmGS4	Unkn	NaCl-CK-2	21.0253
C10	SYBR	GmGS4	Unkn	NaCl-CK-3	21.5141
C11	SYBR	GmGS4	Unkn	NaCl-CK-3	21.4743
C12	SYBR	GmGS4	Unkn	NaCl-CK-3	21.4729
D01	SYBR	GmGS6	Unkn	NaCl-CK-1	15.9813
D02	SYBR	GmGS6	Unkn	NaCl-CK-1	15.83
D03	SYBR	GmGS6	Unkn	NaCl-CK-1	15.6222
D04	SYBR	GmGS6	Unkn	NaCl-CK-2	17.2024
D05	SYBR	GmGS6	Unkn	NaCl-CK-2	16.8896
D06	SYBR	GmGS6	Unkn	NaCl-CK-2	16.9579
D07	SYBR	GmGS6	Unkn	NaCl-CK-3	19.2926
D08	SYBR	GmGS6	Unkn	NaCl-CK-3	19.1677
D09	SYBR	GmGS6	Unkn	NaCl-CK-3	19.1706
D10	SYBR	GmGS10	Unkn	NaCl-CK-1	37.003
D11	SYBR	GmGS10	Unkn	NaCl-CK-1	34.649
D12	SYBR	GmGS10	Unkn	NaCl-CK-1	38.0877
E01	SYBR	GmGS10	Unkn	NaCl-CK-2	37.6328
E02	SYBR	GmGS10	Unkn	NaCl-CK-2	36.7373
E03	SYBR	GmGS10	Unkn	NaCl-CK-2	35.8418
E04	SYBR	GmGS10	Unkn	NaCl-CK-3	38.4658
E05	SYBR	GmGS10	Unkn	NaCl-CK-3	38.3501
E06	SYBR	GmGS10	Unkn	NaCl-CK-3	40.2345
E07	SYBR	GmNIA2	Unkn	NaCl-CK-1	20.3009
E08	SYBR	GmNIA2	Unkn	NaCl-CK-1	20.0184
E09	SYBR	GmNIA2	Unkn	NaCl-CK-1	19.7811
E10	SYBR	GmNIA2	Unkn	NaCl-CK-2	21.8259
E11	SYBR	GmNIA2	Unkn	NaCl-CK-2	21.601
E12	SYBR	GmNIA2	Unkn	NaCl-CK-2	21.5616
F01	SYBR	GmNIA2	Unkn	NaCl-CK-3	21.0624
F02	SYBR	GmNIA2	Unkn	NaCl-CK-3	21.0263
F03	SYBR	GmNIA2	Unkn	NaCl-CK-3	21.1015
F04	SYBR	Actin	Unkn	NaCl-CK-1	18.4476
F05	SYBR	Actin	Unkn	NaCl-CK-1	18.4429
F06	SYBR	Actin	Unkn	NaCl-CK-1	18.3505
F07	SYBR	Actin	Unkn	NaCl-CK-2	19.7273
F08	SYBR	Actin	Unkn	NaCl-CK-2	19.51
F09	SYBR	Actin	Unkn	NaCl-CK-2	19.6034
F10	SYBR	Actin	Unkn	NaCl-CK-3	19.5398
F11	SYBR	Actin	Unkn	NaCl-CK-3	19.6983
F12	SYBR	Actin	Unkn	NaCl-CK-3	19.5905

## Sheet: NaCL24h
Well	Fluor	Target	Content	Sample	Cq
A01	SYBR	GmFd-GOGAT1	Unkn	NaCl24h.1	22.7836
A02	SYBR	GmFd-GOGAT1	Unkn	NaCl24h.1	22.0186
A03	SYBR	GmFd-GOGAT1	Unkn	NaCl24h.1	22.293
A04	SYBR	GmFd-GOGAT1	Unkn	NaCl24h.2	20.3443
A05	SYBR	GmFd-GOGAT1	Unkn	NaCl24h.2	20.456
A06	SYBR	GmFd-GOGAT1	Unkn	NaCl24h.2	20.7419
A07	SYBR	GmFd-GOGAT1	Unkn	NaCl24h.3	23.6468
A08	SYBR	GmFd-GOGAT1	Unkn	NaCl24h.3	22.8568
A09	SYBR	GmFd-GOGAT1	Unkn	NaCl24h.3	22.3564
A10	SYBR	GmNADH-GOGAT1	Unkn	NaCl24h.1	22.0144
A11	SYBR	GmNADH-GOGAT1	Unkn	NaCl24h.1	21.5689
A12	SYBR	GmNADH-GOGAT1	Unkn	NaCl24h.1	21.2
B01	SYBR	GmNADH-GOGAT1	Unkn	NaCl24h.2	22.7121
B02	SYBR	GmNADH-GOGAT1	Unkn	NaCl24h.2	22.4461
B03	SYBR	GmNADH-GOGAT1	Unkn	NaCl24h.2	22.1802
B04	SYBR	GmNADH-GOGAT1	Unkn	NaCl24h.3	21.9785
B05	SYBR	GmNADH-GOGAT1	Unkn	NaCl24h.3	21.52
B06	SYBR	GmNADH-GOGAT1	Unkn	NaCl24h.3	21.4466
B07	SYBR	GmNADH-GOGAT3	Unkn	NaCl24h.1	19.0787
B08	SYBR	GmNADH-GOGAT3	Unkn	NaCl24h.1	19.1491
B09	SYBR	GmNADH-GOGAT3	Unkn	NaCl24h.1	19.669
B10	SYBR	GmNADH-GOGAT3	Unkn	NaCl24h.2	17.3211
B11	SYBR	GmNADH-GOGAT3	Unkn	NaCl24h.2	17.3816
B12	SYBR	GmNADH-GOGAT3	Unkn	NaCl24h.2	17.4693
C01	SYBR	GmNADH-GOGAT3	Unkn	NaCl24h.3	20.1789
C02	SYBR	GmNADH-GOGAT3	Unkn	NaCl24h.3	20.4108
C03	SYBR	GmNADH-GOGAT3	Unkn	NaCl24h.3	20.2717
C04	SYBR	GmGS4	Unkn	NaCl24h.1	20.7042
C05	SYBR	GmGS4	Unkn	NaCl24h.1	19.6917
C06	SYBR	GmGS4	Unkn	NaCl24h.1	20.2037
C07	SYBR	GmGS4	Unkn	NaCl24h.2	18.4014
C08	SYBR	GmGS4	Unkn	NaCl24h.2	18.3741
C09	SYBR	GmGS4	Unkn	NaCl24h.2	18.4219
C10	SYBR	GmGS4	Unkn	NaCl24h.3	19.93
C11	SYBR	GmGS4	Unkn	NaCl24h.3	19.6339
C12	SYBR	GmGS4	Unkn	NaCl24h.3	19.7225
D01	SYBR	GmGS6	Unkn	NaCl24h.1	17.9922
D02	SYBR	GmGS6	Unkn	NaCl24h.1	17.6291
D03	SYBR	GmGS6	Unkn	NaCl24h.1	18.2409
D04	SYBR	GmGS6	Unkn	NaCl24h.2	16.0356
D05	SYBR	GmGS6	Unkn	NaCl24h.2	15.4945
D06	SYBR	GmGS6	Unkn	NaCl24h.2	15.9166
D07	SYBR	GmGS6	Unkn	NaCl24h.3	17.6015
D08	SYBR	GmGS6	Unkn	NaCl24h.3	17.539
D09	SYBR	GmGS6	Unkn	NaCl24h.3	17.7534
D10	SYBR	GmGS10	Unkn	NaCl24h.1	38.9068
D11	SYBR	GmGS10	Unkn	NaCl24h.1	38.6658
D12	SYBR	GmGS10	Unkn	NaCl24h.1	39.4247
E01	SYBR	GmGS10	Unkn	NaCl24h.2	36.1011
E02	SYBR	GmGS10	Unkn	NaCl24h.2	36.7291
E03	SYBR	GmGS10	Unkn	NaCl24h.2	36.148
E04	SYBR	GmGS10	Unkn	NaCl24h.3	38.5503
E05	SYBR	GmGS10	Unkn	NaCl24h.3	38.1752
E06	SYBR	GmGS10	Unkn	NaCl24h.3	38.0248
E07	SYBR	GmNIA2	Unkn	NaCl24h.1	22.3959
E08	SYBR	GmNIA2	Unkn	NaCl24h.1	22.4139
E09	SYBR	GmNIA2	Unkn	NaCl24h.1	22.8136
E10	SYBR	GmNIA2	Unkn	NaCl24h.2	21.2959
E11	SYBR	GmNIA2	Unkn	NaCl24h.2	21.106
E12	SYBR	GmNIA2	Unkn	NaCl24h.2	21.3685
F01	SYBR	GmNIA2	Unkn	NaCl24h.3	23.5222
F02	SYBR	GmNIA2	Unkn	NaCl24h.3	23.4982
F03	SYBR	GmNIA2	Unkn	NaCl24h.3	23.6265
F04	SYBR	Actin	Unkn	NaCl24h.1	20.2741
F05	SYBR	Actin	Unkn	NaCl24h.1	20.862
F06	SYBR	Actin	Unkn	NaCl24h.1	21.0697
F07	SYBR	Actin	Unkn	NaCl24h.2	18.699
F08	SYBR	Actin	Unkn	NaCl24h.2	18.8065
F09	SYBR	Actin	Unkn	NaCl24h.2	19.0058
F10	SYBR	Actin	Unkn	NaCl24h.3	21.0899
F11	SYBR	Actin	Unkn	NaCl24h.3	21.2162
F12	SYBR	Actin	Unkn	NaCl24h.3	21.1801

## Sheet: NaCL48h
Well	Fluor	Target	Content	Sample	Cq
A01	SYBR	GmFd-GOGAT1	Unkn	NaCl48h-1	22.0144
A02	SYBR	GmFd-GOGAT1	Unkn	NaCl48h-1	21.5689
A03	SYBR	GmFd-GOGAT1	Unkn	NaCl48h-1	21.2
A04	SYBR	GmFd-GOGAT1	Unkn	NaCl48h-2	22.7121
A05	SYBR	GmFd-GOGAT1	Unkn	NaCl48h-2	22.4461
A06	SYBR	GmFd-GOGAT1	Unkn	NaCl48h-2	22.1802
A07	SYBR	GmFd-GOGAT1	Unkn	NaCl48h-3	21.9785
A08	SYBR	GmFd-GOGAT1	Unkn	NaCl48h-3	21.52
A09	SYBR	GmFd-GOGAT1	Unkn	NaCl48h-3	21.4466
A10	SYBR	GmNADH-GOGAT1	Unkn	NaCl48h-1	19.3581
A11	SYBR	GmNADH-GOGAT1	Unkn	NaCl48h-1	19.8151
A12	SYBR	GmNADH-GOGAT1	Unkn	NaCl48h-1	19.2332
B01	SYBR	GmNADH-GOGAT1	Unkn	NaCl48h-2	19.4688
B02	SYBR	GmNADH-GOGAT1	Unkn	NaCl48h-2	18.5924
B03	SYBR	GmNADH-GOGAT1	Unkn	NaCl48h-2	19.4434
B04	SYBR	GmNADH-GOGAT1	Unkn	NaCl48h-3	19.0179
B05	SYBR	GmNADH-GOGAT1	Unkn	NaCl48h-3	18.932
B06	SYBR	GmNADH-GOGAT1	Unkn	NaCl48h-3	18.8462
B07	SYBR	GmNADH-GOGAT3	Unkn	NaCl48h-1	19.7374
B08	SYBR	GmNADH-GOGAT3	Unkn	NaCl48h-1	19.4179
B09	SYBR	GmNADH-GOGAT3	Unkn	NaCl48h-1	19.1698
B10	SYBR	GmNADH-GOGAT3	Unkn	NaCl48h-2	20.8604
B11	SYBR	GmNADH-GOGAT3	Unkn	NaCl48h-2	20.8602
B12	SYBR	GmNADH-GOGAT3	Unkn	NaCl48h-2	20.86
C01	SYBR	GmNADH-GOGAT3	Unkn	NaCl48h-3	20.8881
C02	SYBR	GmNADH-GOGAT3	Unkn	NaCl48h-3	20.8032
C03	SYBR	GmNADH-GOGAT3	Unkn	NaCl48h-3	20.8877
C04	SYBR	GmGS4	Unkn	NaCl48h-1	20.3795
C05	SYBR	GmGS4	Unkn	NaCl48h-1	20.2432
C06	SYBR	GmGS4	Unkn	NaCl48h-1	19.9694
C07	SYBR	GmGS4	Unkn	NaCl48h-2	19.7873
C08	SYBR	GmGS4	Unkn	NaCl48h-2	19.5823
C09	SYBR	GmGS4	Unkn	NaCl48h-2	19.3772
C10	SYBR	GmGS4	Unkn	NaCl48h-3	19.9303
C11	SYBR	GmGS4	Unkn	NaCl48h-3	19.8235
C12	SYBR	GmGS4	Unkn	NaCl48h-3	20.0094
D01	SYBR	GmGS6	Unkn	NaCl48h-1	17.6287
D02	SYBR	GmGS6	Unkn	NaCl48h-1	17.3814
D03	SYBR	GmGS6	Unkn	NaCl48h-1	16.97
D04	SYBR	GmGS6	Unkn	NaCl48h-2	18.0051
D05	SYBR	GmGS6	Unkn	NaCl48h-2	18.0395
D06	SYBR	GmGS6	Unkn	NaCl48h-2	18.0738
D07	SYBR	GmGS6	Unkn	NaCl48h-3	17.9985
D08	SYBR	GmGS6	Unkn	NaCl48h-3	17.9178
D09	SYBR	GmGS6	Unkn	NaCl48h-3	17.9647
D10	SYBR	GmGS10	Unkn	NaCl48h-1	37.8936
D11	SYBR	GmGS10	Unkn	NaCl48h-1	37.0224
D12	SYBR	GmGS10	Unkn	NaCl48h-1	40.1512
E01	SYBR	GmGS10	Unkn	NaCl48h-2	39.2801
E02	SYBR	GmGS10	Unkn	NaCl48h-2	38.2924
E03	SYBR	GmGS10	Unkn	NaCl48h-2	37.713
E04	SYBR	GmGS10	Unkn	NaCl48h-3	38.1337
E05	SYBR	GmGS10	Unkn	NaCl48h-3	38.5543
E06	SYBR	GmGS10	Unkn	NaCl48h-3	39.9749
E07	SYBR	GmNIA2	Unkn	NaCl48h-1	23.6066
E08	SYBR	GmNIA2	Unkn	NaCl48h-1	23.3222
E09	SYBR	GmNIA2	Unkn	NaCl48h-1	22.7373
E10	SYBR	GmNIA2	Unkn	NaCl48h-2	22.3527
E11	SYBR	GmNIA2	Unkn	NaCl48h-2	23.918
E12	SYBR	GmNIA2	Unkn	NaCl48h-2	23.4833
F01	SYBR	GmNIA2	Unkn	NaCl48h-3	24.6436
F02	SYBR	GmNIA2	Unkn	NaCl48h-3	23.5939
F03	SYBR	GmNIA2	Unkn	NaCl48h-3	23.9017
F04	SYBR	Actin	Unkn	NaCl48h-1	21.0575
F05	SYBR	Actin	Unkn	NaCl48h-1	20.9006
F06	SYBR	Actin	Unkn	NaCl48h-1	19.7568
F07	SYBR	Actin	Unkn	NaCl48h-2	21.0165
F08	SYBR	Actin	Unkn	NaCl48h-2	20.2722
F09	SYBR	Actin	Unkn	NaCl48h-2	20.5287
F10	SYBR	Actin	Unkn	NaCl48h-3	21.2608
F11	SYBR	Actin	Unkn	NaCl48h-3	21.2588
F12	SYBR	Actin	Unkn	NaCl48h-3	21.2763
