# Supplementary material for: Genomic organization and expression profiles of nitrogen assimilation genes in Glycine max
Source: PeerJ. 2024 Jun 24;12:e17590. doi: 10.7717/peerj.17590 (PMC11210457; doi:10.7717/peerj.17590)
Supplement: Supplemental Information 4 [file peerj-12-17590-s004.xlsx]

## Sheet: Table S3
Item to check	Importance	Checklist
Experimental design
Definition of experimental and control groups	E	Page 6 , line 141-148
Number within each group	E	Page 6 , line 148
Assay carried out by the core or investigator’s laboratory?	D	Investigator’s laboratory
Acknowledgment of authors’ contributions	D	NA
Sample
Description	E	Page 6,line 148 -149
Volume/mass of sample processed	D	NA
Microdissection or macrodissection	E	NA
Processing procedure	E	Page 6 line 148-151
If frozen, how and how quickly?	E	page 6 line 149
If fixed, with what and how quickly?	E	NA
Sample storage conditions and duration (especially for FFPEb samples)	E	Page 6 line 152
Nucleic acid extraction
Procedure and/or instrumentation	E	Page 6 line 154-158
Name of kit and details of any modifications	E	Page 6 line 154-155
Source of additional reagents used	D	NA
Details of DNase or RNase treatment	E	Page 6 line 154
Contamination assessment (DNA or RNA)	E	Page 6 line 155-156
Nucleic acid quantification	E	Page 6 line 157-158
Instrument and method	E	Page 6 line 155-158
Purity (A260/A280)	D	Page 6 line 155-158
Yield	D	NA
RNA integrity: method/instrument	E	NA
RIN/RQI or Cq of 3'_x0002_ and 5'_x0002_ transcripts	E	NA
Electrophoresis traces	D	NA
Inhibition testing (Cq dilutions, spike, or other)	E	NA
Reverse transcription
Complete reaction conditions	E	Page 6 line 164-165
Amount of RNA and reaction volume	E	Page 6 line 162 -164
Priming oligonucleotide (if using GSP) and concentration	E	NA
Reverse transcriptase and concentration	E	Page 6 line 162-163
Temperature and time	E	Page 6 line 164-165
Manufacturer of reagents and catalogue numbers	D	NA
Cqs with and without reverse transcription	D	NA
Storage conditions of cDNA	D	NA
qPCR target information
Gene symbol	E	Present in Table S1
Sequence accession number	E	Present in Table S1
Location of amplicon	D	NA
Amplicon length	E	Present in Table S1
In silico specificity screen (BLAST, and so on)	E	Page 6 line 160-161
Pseudogenes, retropseudogenes, or other homologs?	D	NA
Sequence alignment	D	NA
Secondary structure analysis of amplicon	D	NA
Location of each primer by exon or intron (if applicable)	E	NA
What splice variants are targeted?	E	NA
qPCR oligonucleotides
Primer sequences	E	Present in Table S1
RTPrimerDB identification number	D	NA
Probe sequences	D	NA
Location and identity of any modifications	E	NA
Manufacturer of oligonucleotides	D	NA
Purification method	D	NA
qPCR protocol
Complete reaction conditions	E	Page 7 line 170-172
Reaction volume and amount of cDNA/DNA	E	page 7 line 169-170
Primer, (probe), Mg2+, and dNTP concentrations	E	Page 7 line 166- 167
Polymerase identity and concentration	E	NA
Buffer/kit identity and manufacturer	E	Page 7 line 166-167
Exact chemical composition of the buffer	D	NA
Additives (SYBR Green I, DMSO, and so forth)	E	Page 7 line 167
Manufacturer of plates/tubes and catalog number	D	NA
Complete thermocycling parameters	E	Page 7 line 170-171
Reaction setup (manual/robotic)	D	NA
Manufacturer of qPCR instrument	E	NA
qPCR validation
Evidence of optimization (from gradients)	D	NA
Specificity (gel, sequence, melt, or digest)	E	Page 7 line 171-172
For SYBR Green I, Cq of the NTC	E	NA
Calibration curves with slope and y intercept	E	NA
PCR efficiency calculated from slope	E	NA
CIs for PCR efficiency or SE	D	NA
r2 of calibration curve	E	NA
Linear dynamic range	E	NA
Cq variation at LOD	E	NA
CIs throughout range	D	NA
Evidence for LOD	E	NA
If multiplex, efficiency and LOD of each assay	E	NA
Data analysis
qPCR analysis program (source, version)	E	Page 7 line 173-174
Method of Cq determination	E	Page 7 line 175-176
Outlier identification and disposition	E	No outliers were identified
Results for NTCs	E	No available Cq value for all NTCs
Justification of number and choice of reference genes	E	Page 7 line 175
Description of normalization method	E	Page 7 line 174-175
Number and concordance of biological replicates	D	Page 7 line 176
Number and stage (reverse transcription or qPCR) of technical replicates	E	Page 7 line 177
Repeatability (intraassay variation)	E	NA
Reproducibility (interassay variation, CV)	D	NA
Power analysis	D	NA
Statistical methods for results significance	E	Page 7 line 177
Software (source, version)	E	Page 7 line 178
Cq or raw data submission with RDML	D	Table S5
