# Supplementary material for: Genomic organization and expression profiles of nitrogen assimilation genes in Glycine max
Source: PeerJ. 2024 Jun 24;12:e17590. doi: 10.7717/peerj.17590 (PMC11210457; doi:10.7717/peerj.17590)
Supplement: Supplemental Information 5 [file peerj-12-17590-s005.xlsx]

## Sheet: Table S4
Table S4. Characteristics of the Nitrogen assimilation genes and subcellular localization prediction
Gene Family	Gene name	Gene ID	Gene position			MW(kDa)	aa	pI	Instability index	Aliphatic index	Subcellular location
			Chr	Start	End
GS	GmGS1	Glyma.02G243901.1	Gm02	45023618	45025841	17.2322	155	9.33	40.5	88	Chloroplast
	GmGS2	Glyma.02G244000.1	Gm02	45029608	45033988	39.3265	356	6.03	39.75	76.77	Cytoplasmic
	GmGS3	Glyma.07G104500.1	Gm07	9933588	9938833	39.148	356	5.32	40.49	76.49	Cytoplasmic
	GmGS4	Glyma.09G173200.1	Gm09	40684955	40689275	39.212	356	5.22	40.29	74.55	Cytoplasmic
	GmGS5	Glyma.10G060200.2	Gm10	5541691	5557619	92.67	835	6.04	41.01	94.78	Chloroplast
	GmGS6	Glyma.11G215500.1	Gm11	35760219	35764570	38.9909	356	5.48	37.96	77.84	Cytoplasmic
	GmGS7	Glyma.13G210800.4	Gm13	31865244	31869509	47.6537	432	6.42	42.55	78.15	Chloroplast-Mitochondrial-Nuclear
	GmGS8	Glyma.14G213300.1	Gm14	48686645	48690834	39.2083	356	6.12	38.63	74.3	Cytoplasmic
	GmGS9	Glyma.15G102000.3	Gm15	7941879	7947937	47.6918	432	6.73	43.16	78.15	Chloroplast-Mitochondrial-Nuclear
	GmGS10	Glyma.18G041100.1	Gm18	3448601	3452941	39.141	356	5.48	39.47	75.9	Cytoplasmic
GOGAT	GmFd-GOGAT1	Glyma.03G128300.4	Gm03	35462944	35491470	177.201	1626	6.39	40.45	89.29	Chloroplast
	GmFd-GOGAT2	Glyma.19G130800.1	Gm19	39508753	39547999	239.589	2185	6.14	36.55	84.29	Chloroplast
	GmNADH-GOGAT1	Glyma.04G236900.2	Gm04	49366393	49380142	240.354	2192	6.38	36.76	85.28	Mitochondrial
	GmNADH-GOGAT2	Glyma.06G127400.1	Gm06	10396299	10409639	482.519	4395	6.31	36.53	84.98	Chloroplast
	GmNADH-GOGAT3	Glyma.14G162300.1	Gm14	39912118	39924522	241.034	2192	6.26	36.6	85.02	Chloroplast
	GmNADH-GOGAT4	Glyma.19G065600.1	Gm19	20507044	20535518	241.986	2197	6.31	37.13	85.09	Chloroplast
NR	GmNIA1	Glyma.06G109200.1	Gm06	8764977	8769679	100.078	890	6.41	40.92	80.24	Mitochondrial
	GmNIA2	Glyma.13G084000.1	Gm13	18494412	18499345	99.7599	886	6.65	36.63	76.79	Peroxisoma-Mitochondrial
	GmNIA3	Glyma.14G164900.1	Gm14	41600810	41607134	99.8993	886	6.94	37.15	78.31	Chloroplast
	GmNIA4	Glyma.14G165000.1	Gm14	41611534	41616736	98.2718	873	6.43	41.27	79.39	Chloroplast
