# Supplementary material for: Genomic organization and expression profiles of nitrogen assimilation genes in Glycine max
Source: PeerJ. 2024 Jun 24;12:e17590. doi: 10.7717/peerj.17590 (PMC11210457; doi:10.7717/peerj.17590)
Supplement: Supplemental Information 6 [file peerj-12-17590-s006.xlsx]

## Sheet: Table S5
Table S5. Non-synonymous (Ka) and synonymous (Ks) nucleotide substitution rates of GS, GOGAT and NR genes in Glycine max
Gene family	Genepairs	Ka	Ks	Ka_Ks
GS	GmGS1/GmGS3	0.297652	2.14607	0.138696
	GmGS1/GmGS4	0.292772	2.83364	0.10332
	GmGS1/GmGS6	0.130177	0.739086	0.176132
	GmGS1/GmGS10	0.129787	0.678547	0.191272
	GmGS3/GmGS4	0.00737711	0.135147	0.0545858
	GmGS3/GmGS8	0.0726469	1.68277	0.0431709
	GmGS3/GmGS10	0.0620663	1.14468	0.0542217
	GmGS4/GmGS6	0.0671804	1.12955	0.0594752
	GmGS4/GmGS8	0.0699445	1.54855	0.0451676
	GmGS4/GmGS10	0.0618316	1.03031	0.0600125
	GmGS6/GmGS8	0.0558102	0.607011	0.0919427
	GmGS6/GmGS10	0.0179686	0.122943	0.146154
	GmGS7/GmGS9	0.00402753	0.0734424	0.0548393
	GmGS8/GmGS10	0.0505508	0.616692	0.0819709
GOGAT	GmNADH-GOGAT1/GmNADH-GOGAT2	0.0141406	0.101551	0.139246
	GmNADH-GOGAT1/GmNADH-GOGAT3	0.0585184	0.508001	0.115194
	GmNADH-GOGAT2/GmNADH-GOGAT3	0.0613131	0.504263	0.12159
	GmFd-GOGAT1/GmFd-GOGAT2	0.00786768	0.0758998	0.103659
NR	GmNIA1/GmNIA2	0.116148	1.02934	0.112838
	GmNIA1/GmNIA3	0.143211	0.986789	0.145128
	GmNIA2/GmNIA3	0.091781	0.578511	0.15865
